# Supplementary material for: An Italian Multicenter Study on Anti-NXP2 Antibodies: Clinical and Serological Associations
Source: Springer Nature journal article supplement (doi:10.1007/s12016-021-08920-y), 2022-01-29
Supplement: MOESM1 [file 20079124]

Table 1 supplemental material: comparison between 21 discordant sera (LB+/IP-) and 211 NXP2 negative patients

|                                       | LB+/IP-<br>n.21 (%) | LB NXP2 -<br>n. 211 (%) | P value (OR;95%CI) |
|---------------------------------------|---------------------|-------------------------|--------------------|
| <b>DEMOGRAPHIC FEATURES</b>           |                     |                         |                    |
| Age at diagnosis, years, median (IQR) | 59 (44.5-66.5)      | 57 (41-66)              | 0.45               |
| Follow-up, months, median (IQR)       | 24 (10.7-69)        | 84 (30-144)             | 0.002              |
| DM                                    | 10 (47.6)           | 62 (29.4)               | 0.13               |
| PM                                    | 6 (28.5)            | 64 (30.3)               | 1                  |
| IBM                                   | 1 (4.8)             | 2 (0.9)                 | 1                  |
| ASS                                   | 1 (4.8)             | 47 (22.3)               | 0.10               |
| OM                                    | 1 (4.8)             | 7 (3.3)                 | 0.53               |
| IMNM                                  | 1 (4.8)             | 0                       | 0.09               |
| <b>CLINICAL FEATURES</b>              |                     |                         |                    |
| Skin rash                             | 9 (42.8)            | 78 (37.5)               | 0.76               |
| Facial rash                           | 4 (19)              | 63 (30)                 | 0.43               |
| Heliotrope rash                       | 3 (14.3)            | 55 (26.3)               | 0.31               |
| Gottron's papules                     | 2 (9.5)             | 55 (26.3)               | 0.11               |
| Periorbital edema                     | 2 (9.5)             | 18 (8.6)                | 0.69               |
| Peripheral edema                      | 0                   | 15 (7.1)                | 0.37               |
| Fever                                 | 4 (19)              | 71 (34)                 | 0.22               |
| Fatigue                               | 16 (76.2)           | 155 (74.5)              | 0.99               |
| Periungual telangiectasia             | 4 (19)              | 33 (15.9)               | 0.75               |
| Cutaneous ulcerations                 | 1 (4.8)             | 28 (13.6)               | 0.48               |
| Calcinosis                            | 2 (9.5)             | 13 (6.2)                | 0.63               |
| Myositis                              | 15 (71.4)           | 167 (79.9)              | 0.41               |
| Mechanic's hands                      | 1 (4.8)             | 43 (20.6)               | 0.13               |
| Sclerodactyly                         | 1 (4.8)             | 40 (19)                 | 0.13               |
| Puffy hands                           | 0                   | 28 (13.4)               | 0.14               |
| Raynaud's phenomenon                  | 6 (28.6)            | 109 (52.1)              | 0.07               |
| Arthritis                             | 3 (14.3)            | 72 (34.4)               | 0.10               |
| Dyspnea                               | 6 (28.6)            | 109 (52.1)              | 0.07               |
| Dysphagia                             | 5 (23.8)            | 61 (29.18)              | 0.80               |
| ILD                                   | 5 (23.8)            | 98 (46.8)               | 0.08               |
| Myocarditis                           | 0                   | 8 (3.98)                | 1                  |
| Scleroderma Pattern by NVC*           | 3/7 (42.8)          | 45/110 (40.9)           | 1                  |
| Anytime Cancer                        | 3 (14.3)            | 40/190 (21.5)           | 0.58               |
| Cancer associated myositis            | 1 (4.8)             | 20/190 (10.5)           | 0.70               |

Data are expressed as median and interquartile range (IQR) or frequencies with percentages (%). ASS= antisynthetase syndrome; CAM= cancer associated myositis; DM= dermatomyositis; IBM= inclusion body myositis; ILD= interstitial lung disease; IMNM= necrotizing autoimmune myositis; OM= overlap myositis; NVC\* =nailfold videocapillaroscopy (NVC) data was available only for 7 NXP2+ discordant LB+/IP- and 110 NXP2- patients, respectively; PM=polymyositis.
